# Supplementary material for: The acquisition of Clostridium tyrobutyricum mutants with improved bioproduction under acidic conditions after two rounds of heavy-ion beam irradiation
Source: PubMed Central journal article supplement (PMC4947956; doi:10.1038/srep29968), 2016-07-18
Supplement: srep29968-s1.pdf [file srep29968-s1.pdf]

## Supplementary Information

### **The acquisition of *Clostridium tyrobutyricum* mutants with improved bioproduction under acidic conditions after two rounds of heavy-ion beam irradiation**

Xiang Zhou<sup>1,\*</sup>, Zhen Yang<sup>1,2</sup>, Ting-Ting Jiang<sup>1,3</sup>, Shu-Yang Wang<sup>1</sup>, Jian-Ping Liang<sup>1</sup>, Xi-Hong Lu<sup>1</sup> & Liang Wang<sup>1,3</sup>

#### **Author affiliations**

1 Institute of Modern Physics, Chinese Academy of Sciences, 509 Nanchang Rd., Lanzhou, Gansu 730000, PR China

2 Nanjing Agricultural University, Nanjing 210095, PR China

3 University of Chinese Academy of Sciences, Beijing 100049, PR China

**\*Corresponding author** E-mail: [syannovich@gmail.com](mailto:syannovich@gmail.com)

\*Corresponding author

Xiang Zhou, Phone: 86-931-4969688 Fax: +86-931-8272100

E-mail: [syannovich@gmail.com](mailto:syanovich@gmail.com)

**Supplementary Information: 12 pages, 1 table**

**Table S1** 329 mutant's strain expression states, individual batch cultures were carried out in chemically defined P2-medium (performed in serum bottles) containing 35 g/L glucose at 37°C, pH=6.0~6.5 over 62 h of biofermentation.

| <i>No. mutants</i>            | <i>Maximum biomass concentration (g/L)</i> | <i>Hydrogen production (L)</i> | <i>Butyric acid concentration (g/L)</i> | <i>Y<sub>butyric acid</sub>:Y<sub>acetic acid</sub> ratio (B/A) ratio</i> |
|-------------------------------|--------------------------------------------|--------------------------------|-----------------------------------------|---------------------------------------------------------------------------|
| FS-ZKJ-D <sub>80-85</sub> -1  | 1.417                                      | 13.466                         | 5.666                                   | 0.758907                                                                  |
| FS-ZKJ-D <sub>80-85</sub> -2  | 1.452                                      | 10.302                         | 21.976                                  | 5.108322                                                                  |
| FS-ZKJ-D <sub>80-85</sub> -3  | 1.175                                      | 7.771                          | 7.6                                     | 4.291361                                                                  |
| FS-ZKJ-D <sub>80-85</sub> -4  | 1.512                                      | 13.264                         | 14.254                                  | 1.96228                                                                   |
| FS-ZKJ-D <sub>80-85</sub> -5  | 1.599                                      | 12.288                         | 17.187                                  | 2.733302                                                                  |
| FS-ZKJ-D <sub>80-85</sub> -6  | 1.492                                      | 14.113                         | 12.549                                  | 1.546777                                                                  |
| FS-ZKJ-D <sub>80-85</sub> -7  | 1.735                                      | 12.937                         | 6.109                                   | 0.88064                                                                   |
| FS-ZKJ-D <sub>80-85</sub> -8  | 1.567                                      | 7.249                          | 22.049                                  | 17.65332                                                                  |
| FS-ZKJ-D <sub>80-85</sub> -9  | 1.493                                      | 8.872                          | 22.617                                  | 7.875                                                                     |
| FS-ZKJ-D <sub>80-85</sub> -10 | 1.647                                      | 7.556                          | 8.883                                   | 5.708869                                                                  |
| FS-ZKJ-D <sub>80-85</sub> -11 | 1.539                                      | 10.483                         | 18.1                                    | 4.037475                                                                  |
| FS-ZKJ-D <sub>80-85</sub> -12 | 1.2                                        | 8.324                          | 22.807                                  | 9.813683                                                                  |
| FS-ZKJ-D <sub>80-85</sub> -13 | 1.468                                      | 8.218                          | 23.881                                  | 10.76691                                                                  |
| FS-ZKJ-D <sub>80-85</sub> -14 | 1.15                                       | 11.284                         | 23.704                                  | 4.485995                                                                  |
| FS-ZKJ-D <sub>80-85</sub> -15 | 1.566                                      | 13.604                         | 10.5                                    | 1.380852                                                                  |
| FS-ZKJ-D <sub>80-85</sub> -16 | 1.462                                      | 10.651                         | 7.986                                   | 1.71705                                                                   |
| FS-ZKJ-D <sub>80-85</sub> -17 | 1.13                                       | 15.751                         | 12.45                                   | 1.276792                                                                  |
| FS-ZKJ-D <sub>80-85</sub> -18 | 1.228                                      | 10.475                         | 11.677                                  | 2.609385                                                                  |
| FS-ZKJ-D <sub>80-85</sub> -19 | 1.122                                      | 15.29                          | 7.589                                   | 0.8169                                                                    |
| FS-ZKJ-D <sub>80-85</sub> -20 | 1.262                                      | 11.725                         | 16.852                                  | 2.943581                                                                  |
| FS-ZKJ-D <sub>80-85</sub> -21 | 1.681                                      | 11.4                           | 9.131                                   | 1.690926                                                                  |
| FS-ZKJ-D <sub>80-85</sub> -22 | 1.706                                      | 10.567                         | 6.739                                   | 1.475586                                                                  |
| FS-ZKJ-D <sub>80-85</sub> -23 | 1.588                                      | 12.538                         | 6.202                                   | 0.948608                                                                  |
| FS-ZKJ-D <sub>80-85</sub> -24 | 1.24                                       | 15.387                         | 11.878                                  | 1.265367                                                                  |
| FS-ZKJ-D <sub>80-85</sub> -25 | 1.393                                      | 9.848                          | 17.002                                  | 4.418399                                                                  |
| FS-ZKJ-D <sub>80-85</sub> -26 | 1.553                                      | 14.739                         | 8.812                                   | 1.008353                                                                  |

|                               |       |        |        |          |
|-------------------------------|-------|--------|--------|----------|
| FS-ZKJ-D <sub>80-85</sub> -27 | 1.553 | 14.195 | 6.693  | 0.816718 |
| FS-ZKJ-D <sub>80-85</sub> -28 | 1.636 | 10.84  | 17.796 | 3.67686  |
| FS-ZKJ-D <sub>80-85</sub> -29 | 1.364 | 15.226 | 15.506 | 1.680685 |
| FS-ZKJ-D <sub>80-85</sub> -30 | 1.647 | 12.675 | 8.208  | 1.229663 |
| FS-ZKJ-D <sub>80-85</sub> -31 | 1.474 | 11.355 | 11.236 | 2.098226 |
| FS-ZKJ-D <sub>80-85</sub> -32 | 1.7   | 9.539  | 8.599  | 2.429782 |
| FS-ZKJ-D <sub>80-85</sub> -33 | 1.751 | 7.413  | 11.627 | 8.228592 |
| FS-ZKJ-D <sub>80-85</sub> -34 | 1.693 | 13.584 | 22.344 | 2.946203 |
| FS-ZKJ-D <sub>80-85</sub> -35 | 1.17  | 14.344 | 7.689  | 0.9215   |
| FS-ZKJ-D <sub>80-85</sub> -36 | 1.254 | 13.325 | 13.453 | 1.836587 |
| FS-ZKJ-D <sub>80-85</sub> -37 | 1.21  | 11.405 | 15.939 | 2.948936 |
| FS-ZKJ-D <sub>80-85</sub> -38 | 1.776 | 13.321 | 9.149  | 1.249693 |
| FS-ZKJ-D <sub>80-85</sub> -39 | 1.54  | 7.798  | 11.947 | 6.644605 |
| FS-ZKJ-D <sub>80-85</sub> -40 | 1.319 | 10.834 | 13.376 | 2.767067 |
| FS-ZKJ-D <sub>80-85</sub> -41 | 1.463 | 11.578 | 10.779 | 1.932413 |
| FS-ZKJ-D <sub>80-85</sub> -42 | 1.593 | 14.919 | 21.37  | 2.396009 |
| FS-ZKJ-D <sub>80-85</sub> -43 | 1.324 | 13.74  | 11.326 | 1.463307 |
| FS-ZKJ-D <sub>80-85</sub> -44 | 1.574 | 12.425 | 16.579 | 2.580389 |
| FS-ZKJ-D <sub>80-85</sub> -45 | 1.428 | 14.379 | 13.439 | 1.603891 |
| FS-ZKJ-D <sub>80-85</sub> -46 | 1.503 | 12.722 | 14.313 | 2.129277 |
| FS-ZKJ-D <sub>80-85</sub> -47 | 1.375 | 11.706 | 9.93   | 1.740273 |
| FS-ZKJ-D <sub>80-85</sub> -48 | 1.127 | 13.895 | 21.073 | 2.669158 |
| FS-ZKJ-D <sub>80-85</sub> -49 | 1.272 | 15.139 | 9.909  | 1.084254 |
| FS-ZKJ-D <sub>80-85</sub> -50 | 1.501 | 7.43   | 10.803 | 7.554545 |
| FS-ZKJ-D <sub>80-85</sub> -51 | 1.734 | 14.418 | 9.021  | 1.071632 |
| FS-ZKJ-D <sub>80-85</sub> -52 | 1.47  | 13.783 | 12.745 | 1.637543 |
| FS-ZKJ-D <sub>80-85</sub> -53 | 1.657 | 9.658  | 7.64   | 2.088573 |
| FS-ZKJ-D <sub>80-85</sub> -54 | 1.314 | 11.778 | 13.919 | 2.408965 |
| FS-ZKJ-D <sub>80-85</sub> -55 | 1.604 | 13.268 | 9.258  | 1.273803 |
| FS-ZKJ-D <sub>80-85</sub> -56 | 1.363 | 12.407 | 17.37  | 2.711097 |
| FS-ZKJ-D <sub>80-85</sub> -57 | 1.259 | 15.03  | 12.664 | 1.402436 |
| FS-ZKJ-D <sub>80-85</sub> -58 | 1.674 | 13.06  | 7.585  | 1.074363 |
| FS-ZKJ-D <sub>80-85</sub> -59 | 1.589 | 10.851 | 18.101 | 3.731396 |

|                               |       |        |        |          |
|-------------------------------|-------|--------|--------|----------|
| FS-ZKJ-D <sub>80-85</sub> -60 | 1.754 | 11.593 | 6.219  | 1.111926 |
| FS-ZKJ-D <sub>80-85</sub> -61 | 1.163 | 11.316 | 8.723  | 1.640895 |
| FS-ZKJ-D <sub>80-85</sub> -62 | 1.476 | 15.178 | 15.171 | 1.652975 |
| FS-ZKJ-D <sub>80-85</sub> -63 | 1.431 | 14.972 | 17.652 | 1.967454 |
| FS-ZKJ-D <sub>80-85</sub> -64 | 1.196 | 13.255 | 20.002 | 2.756995 |
| FS-ZKJ-D <sub>80-85</sub> -65 | 1.212 | 14.592 | 13.478 | 1.568669 |
| FS-ZKJ-D <sub>80-85</sub> -66 | 1.689 | 12.183 | 13.415 | 2.169659 |
| FS-ZKJ-D <sub>80-85</sub> -67 | 1.742 | 10.911 | 12.777 | 2.60171  |
| FS-ZKJ-D <sub>80-85</sub> -68 | 1.616 | 11.39  | 8.329  | 1.545269 |
| FS-ZKJ-D <sub>80-85</sub> -69 | 1.58  | 11.732 | 7.42   | 1.294487 |
| FS-ZKJ-D <sub>80-85</sub> -70 | 1.31  | 12.638 | 6.996  | 1.053932 |
| FS-ZKJ-D <sub>80-85</sub> -71 | 1.167 | 15.542 | 11.966 | 1.254035 |
| FS-ZKJ-D <sub>80-85</sub> -72 | 1.531 | 15.104 | 11.931 | 1.310523 |
| FS-ZKJ-D <sub>80-85</sub> -73 | 1.634 | 12.22  | 15.51  | 2.493569 |
| FS-ZKJ-D <sub>80-85</sub> -74 | 1.662 | 11.75  | 13.629 | 2.370261 |
| FS-ZKJ-D <sub>80-85</sub> -75 | 1.508 | 13.618 | 14.943 | 1.961538 |
| FS-ZKJ-D <sub>80-85</sub> -76 | 1.655 | 11.9   | 23.052 | 3.907119 |
| FS-ZKJ-D <sub>80-85</sub> -77 | 1.579 | 12.29  | 16.789 | 2.669157 |
| FS-ZKJ-D <sub>80-85</sub> -78 | 1.151 | 7.686  | 21.555 | 12.7847  |
| FS-ZKJ-D <sub>80-85</sub> -79 | 1.707 | 10.199 | 21.551 | 5.132412 |
| FS-ZKJ-D <sub>80-85</sub> -80 | 1.418 | 13.495 | 13.542 | 1.806805 |
| FS-ZKJ-D <sub>80-85</sub> -81 | 1.67  | 14.826 | 15.376 | 1.742126 |
| FS-ZKJ-D <sub>80-85</sub> -82 | 1.53  | 14.439 | 17.8   | 2.109255 |
| FS-ZKJ-D <sub>80-85</sub> -83 | 1.607 | 10.115 | 21.736 | 5.282139 |
| FS-ZKJ-D <sub>80-85</sub> -84 | 1.186 | 12.993 | 24.358 | 3.483197 |
| FS-ZKJ-D <sub>80-85</sub> -85 | 1.605 | 14.897 | 5.853  | 0.657862 |
| FS-ZKJ-D <sub>80-85</sub> -86 | 1.407 | 14.471 | 22.612 | 2.669342 |
| FS-ZKJ-D <sub>80-85</sub> -87 | 1.636 | 15.212 | 22.457 | 2.437799 |
| FS-ZKJ-D <sub>80-85</sub> -88 | 1.221 | 13.538 | 6.953  | 0.922393 |
| FS-ZKJ-D <sub>80-85</sub> -89 | 1.128 | 14.594 | 8.72   | 1.014661 |
| FS-ZKJ-D <sub>80-85</sub> -90 | 1.712 | 8.37   | 13.301 | 5.612236 |
| FS-ZKJ-D <sub>80-85</sub> -91 | 1.647 | 7.614  | 14.744 | 9.135068 |
| FS-ZKJ-D <sub>80-85</sub> -92 | 1.227 | 10.273 | 18.688 | 4.373508 |

|                                |       |        |        |          |
|--------------------------------|-------|--------|--------|----------|
| FS-ZKJ-D <sub>80-85</sub> -93  | 1.295 | 14.688 | 24.483 | 2.818025 |
| FS-ZKJ-D <sub>80-85</sub> -94  | 1.552 | 8.127  | 24.503 | 11.51998 |
| FS-ZKJ-D <sub>80-85</sub> -95  | 1.258 | 7.79   | 16.528 | 9.23352  |
| FS-ZKJ-D <sub>80-85</sub> -96  | 1.403 | 15.533 | 22.759 | 2.387391 |
| FS-ZKJ-D <sub>80-85</sub> -97  | 1.384 | 11.588 | 7.807  | 1.397101 |
| FS-ZKJ-D <sub>80-85</sub> -98  | 1.724 | 8.738  | 14.313 | 5.227538 |
| FS-ZKJ-D <sub>80-85</sub> -99  | 1.546 | 9.378  | 7.722  | 2.285968 |
| FS-ZKJ-D <sub>80-85</sub> -100 | 1.186 | 10.131 | 21.769 | 5.269668 |
| FS-ZKJ-D <sub>80-85</sub> -101 | 1.592 | 15.245 | 10.206 | 1.103948 |
| FS-ZKJ-D <sub>80-85</sub> -102 | 1.756 | 14.639 | 12.797 | 1.481306 |
| FS-ZKJ-D <sub>80-85</sub> -103 | 1.511 | 8.309  | 16.204 | 7.017757 |
| FS-ZKJ-D <sub>80-85</sub> -104 | 1.52  | 15.242 | 10.242 | 1.108202 |
| FS-ZKJ-D <sub>80-85</sub> -105 | 1.422 | 14.78  | 24.266 | 2.763781 |
| FS-ZKJ-D <sub>80-85</sub> -106 | 1.242 | 10.941 | 5.63   | 1.139445 |
| FS-ZKJ-D <sub>80-85</sub> -107 | 1.68  | 12.543 | 22.134 | 3.382852 |
| FS-ZKJ-D <sub>80-85</sub> -108 | 1.72  | 10.223 | 10.472 | 2.479754 |
| FS-ZKJ-D <sub>80-85</sub> -109 | 1.547 | 8.173  | 13.24  | 6.092959 |
| FS-ZKJ-D <sub>80-85</sub> -110 | 1.361 | 13.686 | 12.515 | 1.628285 |
| FS-ZKJ-D <sub>80-85</sub> -111 | 1.648 | 15.484 | 10.333 | 1.089519 |
| FS-ZKJ-D <sub>80-85</sub> -112 | 1.169 | 15.273 | 18.188 | 1.961393 |
| FS-ZKJ-D <sub>80-85</sub> -113 | 1.153 | 11.348 | 14.137 | 2.643418 |
| FS-ZKJ-D <sub>80-85</sub> -114 | 1.415 | 15.762 | 21.865 | 2.239807 |
| FS-ZKJ-D <sub>80-85</sub> -115 | 1.491 | 10.537 | 7.248  | 1.597531 |
| FS-ZKJ-D <sub>80-85</sub> -116 | 1.664 | 10.754 | 13.354 | 2.809003 |
| FS-ZKJ-D <sub>80-85</sub> -117 | 1.518 | 12.75  | 18.217 | 2.698815 |
| FS-ZKJ-D <sub>80-85</sub> -118 | 1.681 | 9.219  | 9.798  | 3.043802 |
| FS-ZKJ-D <sub>80-85</sub> -119 | 1.543 | 10.699 | 12.929 | 2.751436 |
| FS-ZKJ-D <sub>80-85</sub> -120 | 1.216 | 9.076  | 12.967 | 4.21554  |
| FS-ZKJ-D <sub>80-85</sub> -121 | 1.6   | 11.869 | 16.222 | 2.764014 |
| FS-ZKJ-D <sub>80-85</sub> -122 | 1.137 | 13.524 | 24.608 | 3.270601 |
| FS-ZKJ-D <sub>80-85</sub> -123 | 1.677 | 8.825  | 12.881 | 4.559646 |
| FS-ZKJ-D <sub>80-85</sub> -124 | 1.352 | 15.564 | 5.785  | 0.604872 |
| FS-ZKJ-D <sub>80-85</sub> -125 | 1.214 | 11.961 | 24.607 | 4.127999 |

|                                |       |        |        |          |
|--------------------------------|-------|--------|--------|----------|
| FS-ZKJ-D <sub>80-85</sub> -126 | 1.28  | 13.891 | 13.509 | 1.71195  |
| FS-ZKJ-D <sub>80-85</sub> -127 | 1.689 | 8.96   | 19.571 | 6.611824 |
| FS-ZKJ-D <sub>80-85</sub> -128 | 1.733 | 12.345 | 7.729  | 1.218125 |
| FS-ZKJ-D <sub>80-85</sub> -129 | 1.552 | 8.973  | 16.991 | 5.715103 |
| FS-ZKJ-D <sub>80-85</sub> -130 | 1.377 | 15.811 | 9.008  | 0.918153 |
| FS-ZKJ-D <sub>80-85</sub> -131 | 1.205 | 9.348  | 19.727 | 5.892174 |
| FS-ZKJ-D <sub>80-85</sub> -132 | 1.36  | 9.419  | 11.728 | 3.430243 |
| FS-ZKJ-D <sub>80-85</sub> -133 | 1.198 | 8.587  | 13.866 | 5.359876 |
| FS-ZKJ-D <sub>80-85</sub> -134 | 1.578 | 7.374  | 14.754 | 10.73799 |
| FS-ZKJ-D <sub>80-85</sub> -135 | 1.256 | 11.32  | 10.67  | 2.005639 |
| FS-ZKJ-D <sub>80-85</sub> -136 | 1.462 | 8.563  | 24.63  | 9.609832 |
| FS-ZKJ-D <sub>80-85</sub> -137 | 1.659 | 13.483 | 10.137 | 1.354671 |
| FS-ZKJ-D <sub>80-85</sub> -138 | 1.274 | 8.418  | 8.413  | 3.479322 |
| FS-ZKJ-D <sub>80-85</sub> -139 | 1.391 | 12.646 | 20.896 | 3.144147 |
| FS-ZKJ-D <sub>80-85</sub> -140 | 1.254 | 12.476 | 15.72  | 2.427424 |
| FS-ZKJ-D <sub>80-85</sub> -141 | 1.57  | 11.04  | 23.348 | 4.63254  |
| FS-ZKJ-D <sub>80-85</sub> -142 | 1.328 | 12.042 | 21.062 | 3.485932 |
| FS-ZKJ-D <sub>80-85</sub> -143 | 1.674 | 15.583 | 15.605 | 1.628404 |
| FS-ZKJ-D <sub>80-85</sub> -144 | 1.236 | 12.846 | 23.549 | 3.439819 |
| FS-ZKJ-D <sub>80-85</sub> -145 | 1.225 | 13.241 | 23.972 | 3.310592 |
| FS-ZKJ-D <sub>80-85</sub> -146 | 1.551 | 15.326 | 16.562 | 1.775895 |
| FS-ZKJ-D <sub>80-85</sub> -147 | 1.534 | 10.838 | 14.901 | 3.079992 |
| FS-ZKJ-D <sub>80-85</sub> -148 | 1.231 | 13.982 | 5.797  | 0.726259 |
| FS-ZKJ-D <sub>80-85</sub> -149 | 1.396 | 8.855  | 18.203 | 6.375832 |
| FS-ZKJ-D <sub>80-85</sub> -150 | 1.447 | 7.593  | 20.253 | 12.71375 |
| FS-ZKJ-D <sub>80-85</sub> -151 | 1.267 | 12.12  | 14.674 | 2.397712 |
| FS-ZKJ-D <sub>80-85</sub> -152 | 1.309 | 10.273 | 9.486  | 2.219986 |
| FS-ZKJ-D <sub>80-85</sub> -153 | 1.763 | 10.406 | 11.679 | 2.650704 |
| FS-ZKJ-D <sub>80-85</sub> -154 | 1.374 | 12.53  | 18.53  | 2.837672 |
| FS-ZKJ-D <sub>80-85</sub> -155 | 1.569 | 15.693 | 8.519  | 0.878882 |
| FS-ZKJ-D <sub>80-85</sub> -156 | 1.497 | 10.444 | 16.708 | 3.759676 |
| FS-ZKJ-D <sub>80-85</sub> -157 | 1.299 | 14.407 | 13.858 | 1.648388 |
| FS-ZKJ-D <sub>80-85</sub> -158 | 1.466 | 8.003  | 19.248 | 9.609586 |

|                                |       |        |        |          |
|--------------------------------|-------|--------|--------|----------|
| FS-ZKJ-D <sub>80-85</sub> -159 | 1.493 | 11.09  | 16.77  | 3.294695 |
| FS-ZKJ-D <sub>80-85</sub> -160 | 1.5   | 12.055 | 6.577  | 1.08621  |
| FS-ZKJ-D <sub>80-85</sub> -161 | 1.293 | 10.044 | 13.976 | 3.455984 |
| FS-ZKJ-D <sub>80-85</sub> -162 | 1.148 | 9.696  | 11.42  | 3.089827 |
| FS-ZKJ-D <sub>80-85</sub> -163 | 1.498 | 8.345  | 19.066 | 8.13049  |
| FS-ZKJ-D <sub>80-85</sub> -164 | 1.573 | 12.177 | 23.105 | 3.740489 |
| FS-ZKJ-D <sub>80-85</sub> -165 | 1.429 | 8.898  | 21.158 | 7.300897 |
| FS-ZKJ-D <sub>80-85</sub> -166 | 1.386 | 13.742 | 19.455 | 2.512917 |
| FS-ZKJ-D <sub>80-85</sub> -167 | 1.374 | 8.638  | 24.956 | 9.460197 |
| FS-ZKJ-D <sub>80-85</sub> -168 | 1.778 | 9.445  | 10.65  | 3.091437 |
| FS-ZKJ-D <sub>80-85</sub> -169 | 1.425 | 11.563 | 6.447  | 1.158907 |
| FS-ZKJ-D <sub>80-85</sub> -170 | 1.773 | 14.869 | 8.589  | 0.968429 |
| FS-ZKJ-D <sub>80-85</sub> -171 | 1.527 | 9.66   | 21.154 | 5.779781 |
| FS-ZKJ-D <sub>80-85</sub> -172 | 1.179 | 13.159 | 8.794  | 1.228384 |
| FS-ZKJ-D <sub>80-85</sub> -173 | 1.525 | 13.941 | 7.999  | 1.007304 |
| FS-ZKJ-D <sub>80-85</sub> -174 | 1.709 | 13.211 | 14.574 | 2.021079 |
| FS-ZKJ-D <sub>80-85</sub> -175 | 1.627 | 10.753 | 23.364 | 4.915632 |
| FS-ZKJ-D <sub>80-85</sub> -176 | 1.361 | 14.963 | 7.53   | 0.84012  |
| FS-ZKJ-D <sub>80-85</sub> -177 | 1.42  | 13.014 | 8.931  | 1.273311 |
| FS-ZKJ-D <sub>80-85</sub> -178 | 1.583 | 9.254  | 10.024 | 3.080516 |
| FS-ZKJ-D <sub>80-85</sub> -179 | 1.775 | 11.597 | 22.055 | 3.940504 |
| FS-ZKJ-D <sub>80-85</sub> -180 | 1.338 | 15.142 | 23.444 | 2.564428 |
| FS-ZKJ-D <sub>80-85</sub> -181 | 1.721 | 13.879 | 8.024  | 1.018403 |
| FS-ZKJ-D <sub>80-85</sub> -182 | 1.418 | 10.768 | 16.389 | 3.43729  |
| FS-ZKJ-D <sub>80-85</sub> -183 | 1.675 | 8.303  | 24.688 | 10.71993 |
| FS-ZKJ-D <sub>80-85</sub> -184 | 1.592 | 7.796  | 13.045 | 7.263363 |
| FS-ZKJ-D <sub>80-85</sub> -185 | 1.334 | 13.242 | 12.878 | 1.778238 |
| FS-ZKJ-D <sub>80-85</sub> -186 | 1.714 | 9.05   | 10.469 | 3.432459 |
| FS-ZKJ-D <sub>80-85</sub> -187 | 1.283 | 9.193  | 10.129 | 3.172252 |
| FS-ZKJ-D <sub>80-85</sub> -188 | 1.428 | 7.524  | 10.774 | 7.069554 |
| FS-ZKJ-D <sub>80-85</sub> -189 | 1.178 | 13.217 | 6.582  | 0.912013 |
| FS-ZKJ-D <sub>80-85</sub> -190 | 1.474 | 9.474  | 22.541 | 6.488486 |
| FS-ZKJ-D <sub>80-85</sub> -191 | 1.504 | 10.509 | 6.31   | 1.399423 |

|                                |       |        |        |          |
|--------------------------------|-------|--------|--------|----------|
| FS-ZKJ-D <sub>80-85</sub> -192 | 1.734 | 9.255  | 16.229 | 4.985868 |
| FS-ZKJ-D <sub>80-85</sub> -193 | 1.628 | 11.081 | 22.47  | 4.422358 |
| FS-ZKJ-D <sub>80-85</sub> -194 | 1.523 | 15.714 | 18.413 | 1.895512 |
| FS-ZKJ-D <sub>80-85</sub> -195 | 1.151 | 11.052 | 23.823 | 4.715558 |
| FS-ZKJ-D <sub>80-85</sub> -196 | 1.586 | 8.754  | 11.228 | 4.076979 |
| FS-ZKJ-D <sub>80-85</sub> -197 | 1.554 | 14.35  | 15.064 | 1.804072 |
| FS-ZKJ-D <sub>80-85</sub> -198 | 1.399 | 9.899  | 7.212  | 1.849705 |
| FS-ZKJ-D <sub>80-85</sub> -199 | 1.698 | 10.523 | 24.857 | 5.495689 |
| FS-ZKJ-D <sub>80-85</sub> -200 | 1.432 | 9.77   | 6.324  | 1.677454 |
| FS-ZKJ-D <sub>80-85</sub> -201 | 1.138 | 12.065 | 22.315 | 3.679308 |
| FS-ZKJ-D <sub>80-85</sub> -202 | 1.431 | 10.6   | 18.976 | 4.125217 |
| FS-ZKJ-D <sub>80-85</sub> -203 | 1.775 | 7.293  | 16.888 | 13.0611  |
| FS-ZKJ-D <sub>80-85</sub> -204 | 1.305 | 15.407 | 23.974 | 2.548528 |
| FS-ZKJ-D <sub>80-85</sub> -205 | 1.19  | 14.284 | 24.199 | 2.921173 |
| FS-ZKJ-D <sub>80-85</sub> -206 | 1.701 | 11.087 | 10.116 | 1.988598 |
| FS-ZKJ-D <sub>80-85</sub> -207 | 1.386 | 10.218 | 18.016 | 4.271219 |
| FS-ZKJ-D <sub>80-85</sub> -208 | 1.176 | 10.646 | 22.053 | 4.746664 |
| FS-ZKJ-D <sub>80-85</sub> -209 | 1.318 | 11.807 | 11.535 | 1.986396 |
| FS-ZKJ-D <sub>80-85</sub> -210 | 1.14  | 13.944 | 11.501 | 1.447759 |
| FS-ZKJ-D <sub>80-85</sub> -211 | 1.259 | 13.998 | 18.353 | 2.294699 |
| FS-ZKJ-D <sub>80-85</sub> -212 | 1.459 | 8.774  | 21.792 | 7.855804 |
| FS-ZKJ-D <sub>80-85</sub> -213 | 1.489 | 7.888  | 9.34   | 4.947034 |
| FS-ZKJ-D <sub>80-85</sub> -214 | 1.769 | 7.946  | 9.797  | 5.03443  |
| FS-ZKJ-D <sub>80-85</sub> -215 | 1.325 | 12.254 | 20.867 | 3.336585 |
| FS-ZKJ-D <sub>80-85</sub> -216 | 1.51  | 7.989  | 19.631 | 9.869784 |
| FS-ZKJ-D <sub>80-85</sub> -217 | 1.273 | 7.63   | 18.548 | 11.37914 |
| FS-ZKJ-D <sub>80-85</sub> -218 | 1.179 | 14.35  | 12.639 | 1.513653 |
| FS-ZKJ-D <sub>80-85</sub> -219 | 1.171 | 15.002 | 13.399 | 1.488447 |
| FS-ZKJ-D <sub>80-85</sub> -220 | 1.688 | 15.027 | 11.509 | 1.274953 |
| FS-ZKJ-D <sub>80-85</sub> -221 | 1.459 | 7.387  | 24.433 | 17.61572 |
| FS-ZKJ-D <sub>80-85</sub> -222 | 1.671 | 7.676  | 5.592  | 3.336516 |
| FS-ZKJ-D <sub>80-85</sub> -223 | 1.697 | 14.356 | 17.936 | 2.146482 |
| FS-ZKJ-D <sub>80-85</sub> -224 | 1.724 | 11.145 | 17.66  | 3.432459 |



|                                |       |        |        |          |
|--------------------------------|-------|--------|--------|----------|
| FS-ZKJ-D <sub>80-85</sub> -225 | 1.328 | 9.207  | 14.916 | 4.651076 |
| FS-ZKJ-D <sub>80-85</sub> -226 | 1.335 | 13.924 | 15.463 | 1.951413 |
| FS-ZKJ-D <sub>80-85</sub> -227 | 1.424 | 15.45  | 21.325 | 2.256614 |
| FS-ZKJ-D <sub>80-85</sub> -228 | 1.201 | 9.864  | 19.885 | 5.146222 |
| FS-ZKJ-D <sub>80-85</sub> -229 | 1.633 | 10.783 | 19.75  | 4.129208 |
| FS-ZKJ-D <sub>80-85</sub> -230 | 1.568 | 9.656  | 13.55  | 3.706236 |
| FS-ZKJ-D <sub>80-85</sub> -231 | 1.227 | 8.019  | 22.486 | 11.1372  |
| FS-ZKJ-D <sub>80-85</sub> -232 | 1.597 | 14.164 | 24.858 | 3.044831 |
| FS-ZKJ-D <sub>80-85</sub> -233 | 1.578 | 11.471 | 22.82  | 4.171084 |
| FS-ZKJ-D <sub>80-85</sub> -234 | 1.769 | 12.178 | 16.463 | 2.664778 |
| FS-ZKJ-D <sub>80-85</sub> -235 | 1.727 | 8.986  | 17.679 | 5.92063  |
| FS-ZKJ-D <sub>80-85</sub> -236 | 1.498 | 9.059  | 15.987 | 5.226218 |
| FS-ZKJ-D <sub>80-85</sub> -237 | 1.17  | 9.76   | 14.068 | 3.741489 |
| FS-ZKJ-D <sub>80-85</sub> -238 | 1.568 | 14.454 | 21.188 | 2.506269 |
| FS-ZKJ-D <sub>80-85</sub> -239 | 1.435 | 8.688  | 22.238 | 8.273065 |
| FS-ZKJ-D <sub>80-85</sub> -240 | 1.127 | 12.797 | 21.749 | 3.199794 |
| FS-ZKJ-D <sub>80-85</sub> -241 | 1.244 | 13.034 | 5.806  | 0.825419 |
| FS-ZKJ-D <sub>80-85</sub> -242 | 1.527 | 8.117  | 11.862 | 5.603212 |
| FS-ZKJ-D <sub>80-85</sub> -243 | 1.533 | 15.722 | 14.512 | 1.492697 |
| FS-ZKJ-D <sub>80-85</sub> -244 | 1.545 | 10.722 | 14.192 | 3.005506 |
| FS-ZKJ-D <sub>80-85</sub> -245 | 1.621 | 13.913 | 14.001 | 1.769367 |
| FS-ZKJ-D <sub>80-85</sub> -246 | 1.634 | 14.687 | 19.351 | 2.227581 |
| FS-ZKJ-D <sub>80-85</sub> -247 | 1.331 | 7.977  | 8.31   | 4.203338 |
| FS-ZKJ-D <sub>80-85</sub> -248 | 1.486 | 7.989  | 17.776 | 8.937154 |
| FS-ZKJ-D <sub>80-85</sub> -249 | 1.468 | 12.449 | 21.778 | 3.376958 |
| FS-ZKJ-D <sub>80-85</sub> -250 | 1.253 | 14.326 | 13.214 | 1.587077 |
| FS-ZKJ-D <sub>80-85</sub> -251 | 1.385 | 7.943  | 6.776  | 3.487391 |
| FS-ZKJ-D <sub>80-85</sub> -252 | 1.404 | 9.803  | 13.192 | 3.46884  |
| FS-ZKJ-D <sub>80-85</sub> -253 | 1.418 | 13.885 | 8.533  | 1.082181 |
| FS-ZKJ-D <sub>80-85</sub> -254 | 1.295 | 11.837 | 17.832 | 3.054994 |
| FS-ZKJ-D <sub>80-85</sub> -255 | 1.77  | 7.883  | 12.543 | 6.661179 |
| FS-ZKJ-D <sub>80-85</sub> -256 | 1.261 | 12.953 | 10.243 | 1.473177 |
| FS-ZKJ-D <sub>80-85</sub> -257 | 1.264 | 9.779  | 17.226 | 4.558349 |

|                                |       |        |        |          |
|--------------------------------|-------|--------|--------|----------|
| FS-ZKJ-D <sub>80-85</sub> -258 | 1.146 | 7.997  | 21.12  | 10.57586 |
| FS-ZKJ-D <sub>80-85</sub> -259 | 1.344 | 13.053 | 7.133  | 1.011343 |
| FS-ZKJ-D <sub>80-85</sub> -260 | 1.353 | 15.175 | 6.351  | 0.692207 |
| FS-ZKJ-D <sub>80-85</sub> -261 | 1.411 | 12.82  | 22.26  | 3.26393  |
| FS-ZKJ-D <sub>80-85</sub> -262 | 1.221 | 8.748  | 20.505 | 7.46179  |
| FS-ZKJ-D <sub>80-85</sub> -263 | 1.288 | 15.704 | 8.841  | 0.911068 |
| FS-ZKJ-D <sub>80-85</sub> -264 | 1.61  | 11.346 | 21.508 | 4.023195 |
| FS-ZKJ-D <sub>80-85</sub> -265 | 1.437 | 7.761  | 9.333  | 5.29983  |
| FS-ZKJ-D <sub>80-85</sub> -266 | 1.692 | 11.989 | 10.112 | 1.688429 |
| FS-ZKJ-D <sub>80-85</sub> -267 | 1.338 | 10.804 | 13.316 | 2.771857 |
| FS-ZKJ-D <sub>80-85</sub> -268 | 1.266 | 13.595 | 16.697 | 2.19842  |
| FS-ZKJ-D <sub>80-85</sub> -269 | 1.651 | 9.898  | 7.157  | 1.83607  |
| FS-ZKJ-D <sub>80-85</sub> -270 | 1.529 | 11.292 | 10.066 | 1.902116 |
| FS-ZKJ-D <sub>80-85</sub> -271 | 1.275 | 13.82  | 14.796 | 1.892072 |
| FS-ZKJ-D <sub>80-85</sub> -272 | 1.379 | 14.174 | 21.405 | 2.618669 |
| FS-ZKJ-D <sub>80-85</sub> -273 | 1.596 | 9.635  | 8.77   | 2.412655 |
| FS-ZKJ-D <sub>80-85</sub> -274 | 1.628 | 13.002 | 14.57  | 2.080834 |
| FS-ZKJ-D <sub>80-85</sub> -275 | 1.283 | 14.71  | 7.683  | 0.88209  |
| FS-ZKJ-D <sub>80-85</sub> -276 | 1.49  | 10.913 | 13.352 | 2.717688 |
| FS-ZKJ-D <sub>80-85</sub> -277 | 1.493 | 11.468 | 23.427 | 4.284382 |
| FS-ZKJ-D <sub>80-85</sub> -278 | 1.326 | 7.615  | 21.126 | 13.08111 |
| FS-ZKJ-D <sub>80-85</sub> -279 | 1.725 | 14.876 | 8.71   | 0.981298 |
| FS-ZKJ-D <sub>80-85</sub> -280 | 1.551 | 8.481  | 9.867  | 3.977025 |
| FS-ZKJ-D <sub>80-85</sub> -281 | 1.72  | 8.397  | 21.887 | 9.130997 |
| FS-ZKJ-D <sub>80-85</sub> -282 | 1.231 | 9.053  | 8.13   | 2.662954 |
| FS-ZKJ-D <sub>80-85</sub> -283 | 1.572 | 11.12  | 17.416 | 3.401563 |
| FS-ZKJ-D <sub>80-85</sub> -284 | 1.197 | 8.389  | 15.242 | 6.380075 |
| FS-ZKJ-D <sub>80-85</sub> -285 | 1.453 | 14.227 | 15.518 | 1.886228 |
| FS-ZKJ-D <sub>80-85</sub> -286 | 1.581 | 13.431 | 9.586  | 1.290001 |
| FS-ZKJ-D <sub>80-85</sub> -287 | 1.626 | 14.654 | 14.356 | 1.658886 |
| FS-ZKJ-D <sub>80-85</sub> -288 | 1.417 | 9.017  | 11.82  | 3.917799 |
| FS-ZKJ-D <sub>80-85</sub> -289 | 1.142 | 12.49  | 6.053  | 0.932666 |
| FS-ZKJ-D <sub>80-85</sub> -290 | 1.623 | 10.603 | 21.862 | 4.749511 |

|                                |       |        |        |          |
|--------------------------------|-------|--------|--------|----------|
| FS-ZKJ-D <sub>80-85</sub> -291 | 1.767 | 8.622  | 11.796 | 4.498856 |
| FS-ZKJ-D <sub>80-85</sub> -292 | 1.127 | 12.386 | 9.113  | 1.427028 |
| FS-ZKJ-D <sub>80-85</sub> -293 | 1.348 | 15.53  | 9.723  | 1.020252 |
| FS-ZKJ-D <sub>80-85</sub> -294 | 1.675 | 7.309  | 9.251  | 7.067227 |
| FS-ZKJ-D <sub>80-85</sub> -295 | 1.759 | 14.422 | 23.756 | 2.820708 |
| FS-ZKJ-D <sub>80-85</sub> -296 | 1.292 | 15.096 | 18.671 | 2.052661 |
| FS-ZKJ-D <sub>80-85</sub> -297 | 1.25  | 12.016 | 22.254 | 3.699136 |
| FS-ZKJ-D <sub>80-85</sub> -298 | 1.771 | 14.131 | 11.895 | 1.46292  |
| FS-ZKJ-D <sub>80-85</sub> -299 | 1.628 | 11.27  | 10.233 | 1.941746 |
| FS-ZKJ-D <sub>80-85</sub> -300 | 1.126 | 12.998 | 24.959 | 3.56659  |
| FS-ZKJ-D <sub>80-85</sub> -301 | 1.55  | 10.105 | 10.186 | 2.481364 |
| FS-ZKJ-D <sub>80-85</sub> -302 | 1.148 | 12.648 | 8.198  | 1.233153 |
| FS-ZKJ-D <sub>80-85</sub> -303 | 1.201 | 13.254 | 17.156 | 2.36504  |
| FS-ZKJ-D <sub>80-85</sub> -304 | 1.611 | 10.676 | 22.127 | 4.732036 |
| FS-ZKJ-D <sub>80-85</sub> -305 | 1.433 | 12.499 | 6.084  | 0.936144 |
| FS-ZKJ-D <sub>80-85</sub> -306 | 1.638 | 8.085  | 5.533  | 2.653717 |
| FS-ZKJ-D <sub>80-85</sub> -307 | 1.554 | 7.329  | 14.495 | 10.9067  |
| FS-ZKJ-D <sub>80-85</sub> -308 | 1.409 | 15.022 | 8.698  | 0.964088 |
| FS-ZKJ-D <sub>80-85</sub> -309 | 1.677 | 14.61  | 24.417 | 2.835889 |
| FS-ZKJ-D <sub>80-85</sub> -310 | 1.373 | 12.924 | 9.012  | 1.30156  |
| FS-ZKJ-D <sub>80-85</sub> -311 | 1.403 | 15.124 | 9.556  | 1.047348 |
| FS-ZKJ-D <sub>80-85</sub> -312 | 1.129 | 11.795 | 13.985 | 2.413287 |
| FS-ZKJ-D <sub>80-85</sub> -313 | 1.382 | 7.454  | 14.06  | 9.669876 |
| FS-ZKJ-D <sub>80-85</sub> -314 | 1.505 | 11.833 | 18.1   | 3.103034 |
| FS-ZKJ-D <sub>80-85</sub> -315 | 1.435 | 14.352 | 22.884 | 2.739943 |
| FS-ZKJ-D <sub>80-85</sub> -316 | 1.645 | 13.369 | 18.078 | 2.45325  |
| FS-ZKJ-D <sub>80-85</sub> -317 | 1.314 | 10.268 | 18.215 | 4.267807 |
| FS-ZKJ-D <sub>80-85</sub> -318 | 1.677 | 12.229 | 23.245 | 3.731739 |
| FS-ZKJ-D <sub>80-85</sub> -319 | 1.54  | 12.806 | 12.514 | 1.838672 |
| FS-ZKJ-D <sub>80-85</sub> -320 | 1.192 | 11.063 | 24.725 | 4.883468 |
| FS-ZKJ-D <sub>80-85</sub> -321 | 1.303 | 12.191 | 17.76  | 2.86868  |
| FS-ZKJ-D <sub>80-85</sub> -322 | 1.15  | 13.326 | 6.232  | 0.850669 |
| FS-ZKJ-D <sub>80-85</sub> -323 | 1.319 | 7.515  | 20.809 | 13.73531 |

|                                |       |        |        |          |
|--------------------------------|-------|--------|--------|----------|
| FS-ZKJ-D <sub>80-85</sub> -324 | 1.241 | 9.888  | 8.438  | 2.170267 |
| FS-ZKJ-D <sub>80-85</sub> -325 | 1.756 | 14.952 | 18.799 | 2.099978 |
| FS-ZKJ-D <sub>80-85</sub> -326 | 1.362 | 14.702 | 11.288 | 1.297173 |
| FS-ZKJ-D <sub>80-85</sub> -327 | 1.161 | 9.113  | 17.598 | 5.653068 |
| FS-ZKJ-D <sub>80-85</sub> -328 | 1.49  | 15.647 | 9.728  | 1.008396 |
| FS-ZKJ-D <sub>80-85</sub> -329 | 1.384 | 11.439 | 12.093 | 2.223387 |
